# Supplementary material for: Alcoholamine enhanced fractionation of cellulose from lignocellulosic biomass in ionic liquids
Source: Royal Society of Chemistry journal article supplement (doi:10.1039/d3cp01757e), 2023-01-01
Supplement: d3cp01757e1.pdf [file d3cp01757e1.pdf]

## ELECTRONIC SUPPLEMENTARY INFORMATION

### **Alcoholamine enhanced fractionation of cellulose from lignocellulosic biomass in ionic liquids**

Yiwei Zhu,<sup>a,b</sup> Jian Kang,<sup>b,c</sup> Die Gao,<sup>b,d</sup> Bingtong Chen,<sup>b,c</sup> Yi Nie,<sup>b,c</sup> Hui Wang<sup>b,c,\*</sup> and Xiaowen Wu<sup>a,\*</sup>

<sup>a</sup> Engineering Research Center of Ministry of Education for Geological Carbon Storage and Low Carbon Utilization of Resources, Beijing Key Laboratory of Materials Utilization of Nonmetallic Minerals and Solid Wastes, National Laboratory of Mineral Materials, School of Materials Science and Technology, China University of Geosciences (Beijing), 100083, China

<sup>b</sup> Beijing Key Laboratory of Ionic Liquids Clean Process, CAS Key Laboratory of Green Process and Engineering, State Key Laboratory of Multiphase Complex Systems, Institute of Process Engineering, Innovation Academy for Green Manufacture, Chinese Academy of Sciences, Beijing 100190, PR China

<sup>c</sup> College of Chemical Engineering, University of Chinese Academy of Sciences, Beijing 100049, PR China

<sup>d</sup> Henan Institute of Advanced Technology, Zhengzhou University, Zhengzhou 450001, PR China

---

\* Corresponding author, E-mail: [huiwang@ipe.ac.cn](mailto:huiwang@ipe.ac.cn)

\* Corresponding author, E-mail: [xwwu@cugb.edu.cn](mailto:xwwu@cugb.edu.cn)

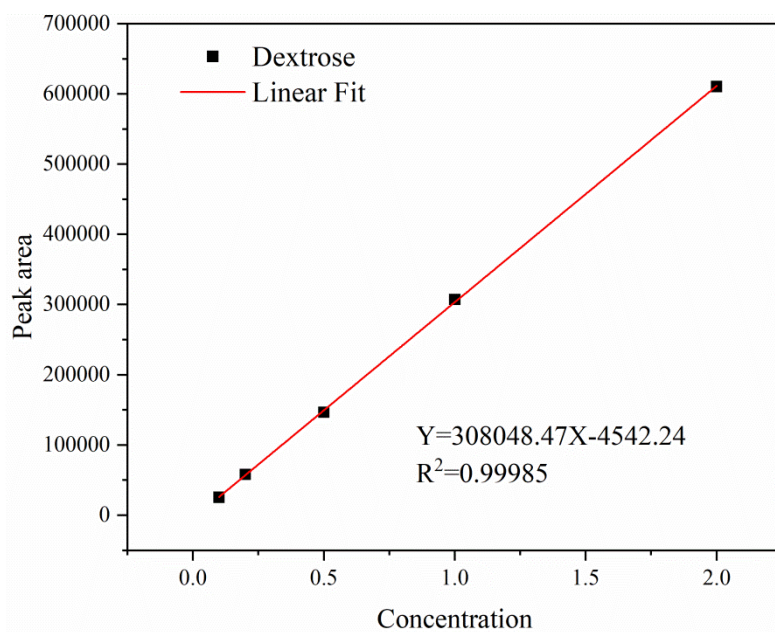

**Fig. S1.** The standard curve of dextrose for quantitative analysis.

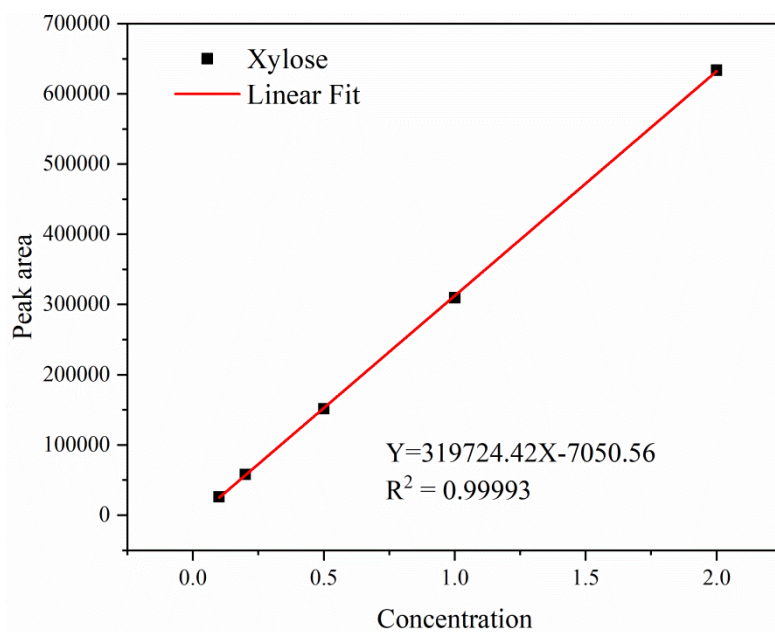

**Fig. S2.** The standard curve of xylose for quantitative analysis.

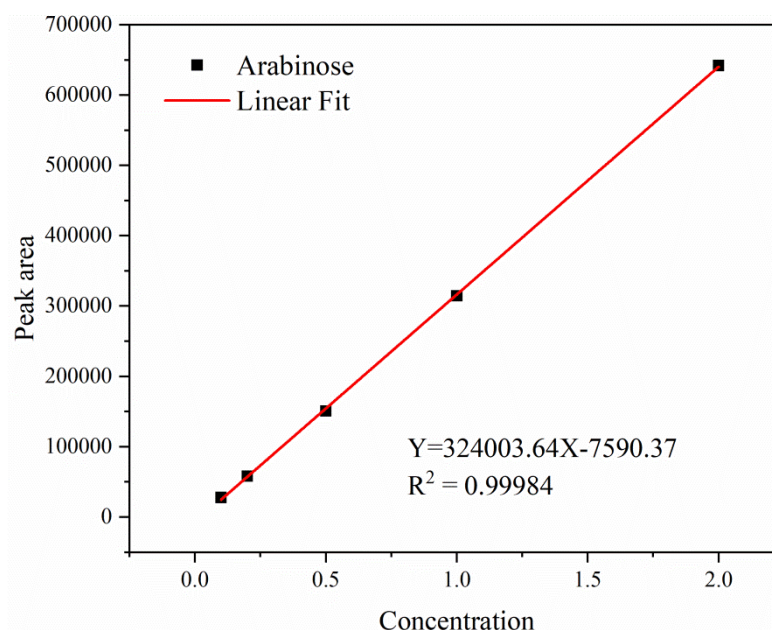

**Fig. S3.** The standard curve of arabinose for quantitative analysis.

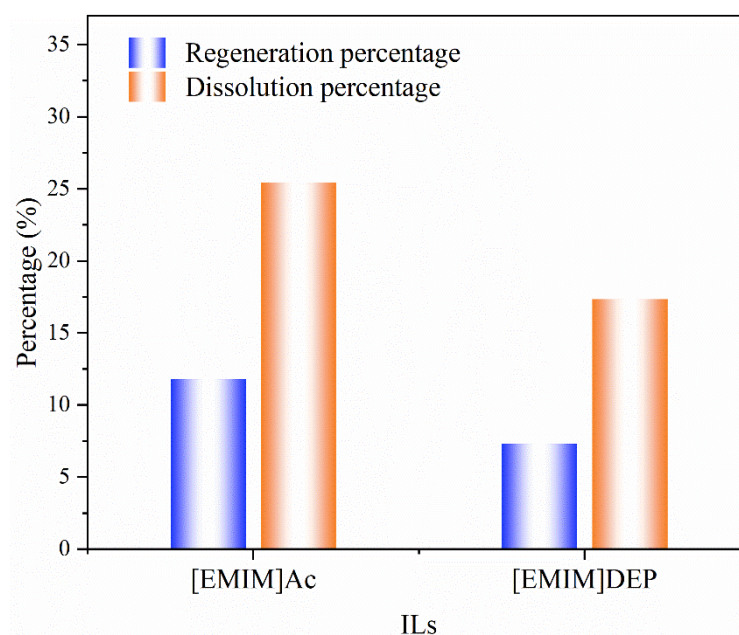

**Fig. S4.** The dissolution and regeneration efficiency of wheat straw in [EMIM]Ac and [EMIM]DEP under the same conditions (The dissolution temperature was 100 °C and the time was 10 h).

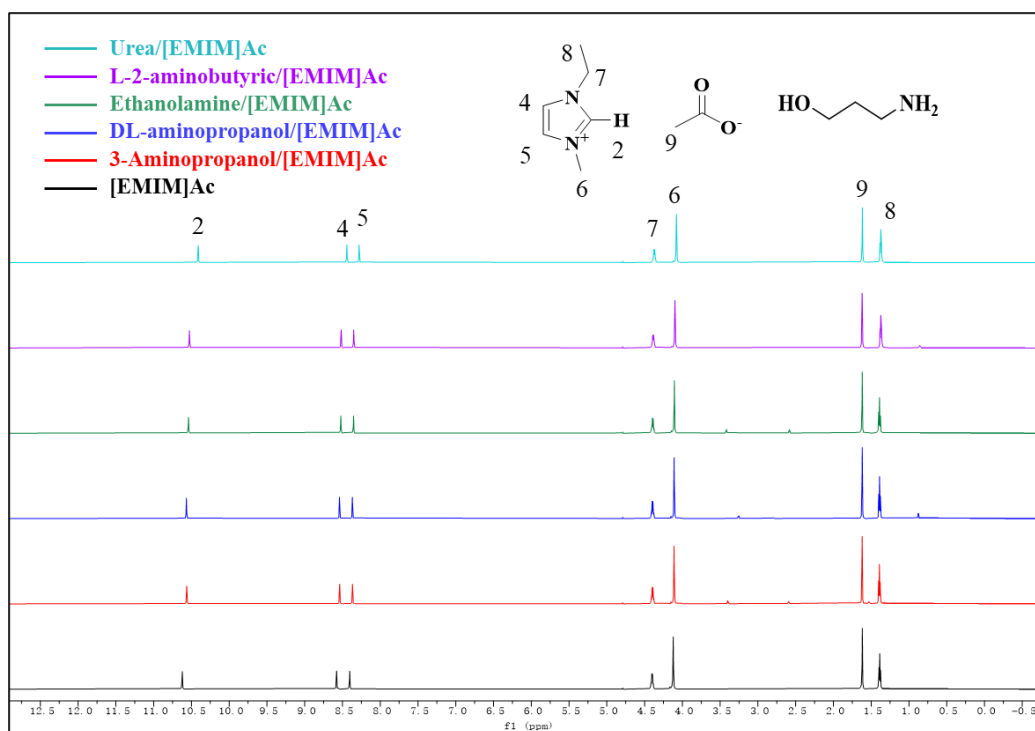

**Fig. S5.**  $^1\text{H}$  NMR spectra of [EMIM]Ac and additive/[EMIM]Ac using  $\text{D}_2\text{O}$  as the external lock.

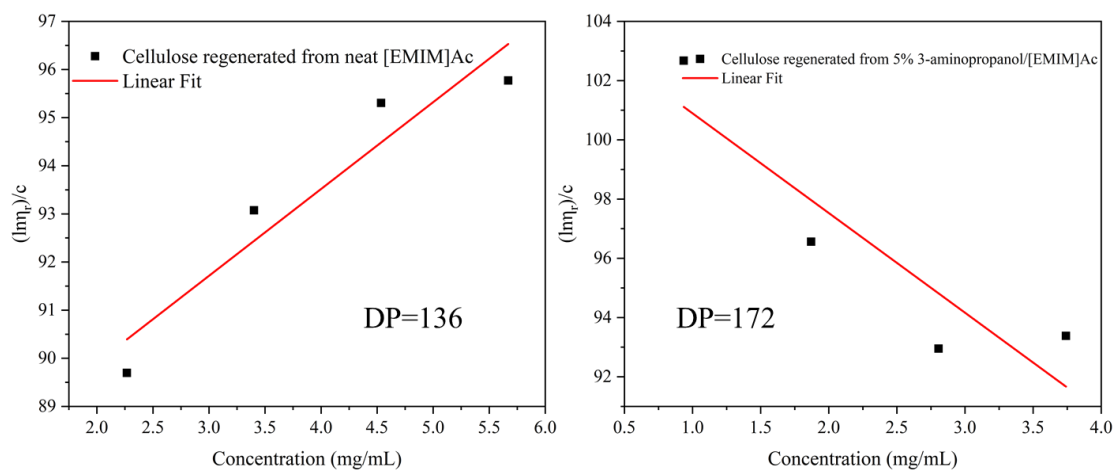

**Fig. S6.** The polymerization degree of cellulose regenerated from neat [EMIM]Ac (left) and 3-aminopropanol/[EMIM]Ac system (right).

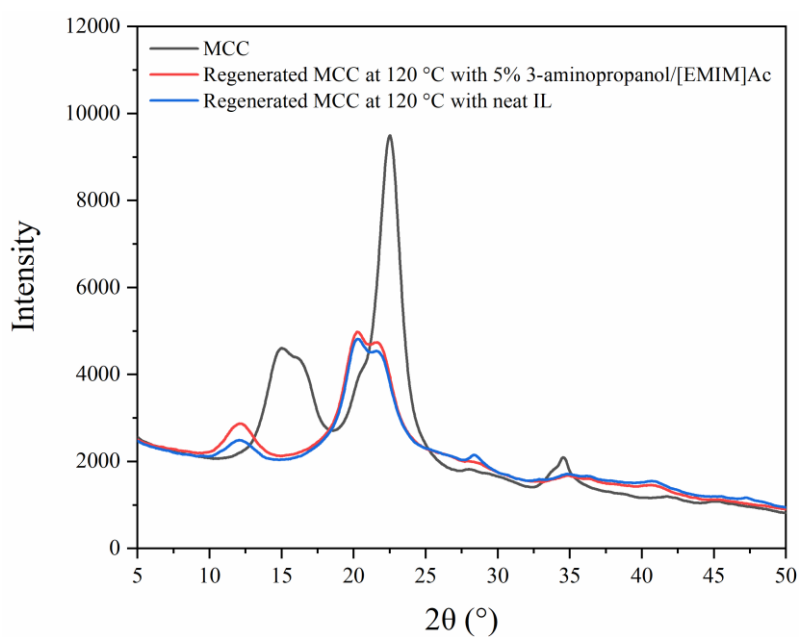

**Fig. S7.** XRD patterns of the raw MCC and regenerated MCC.

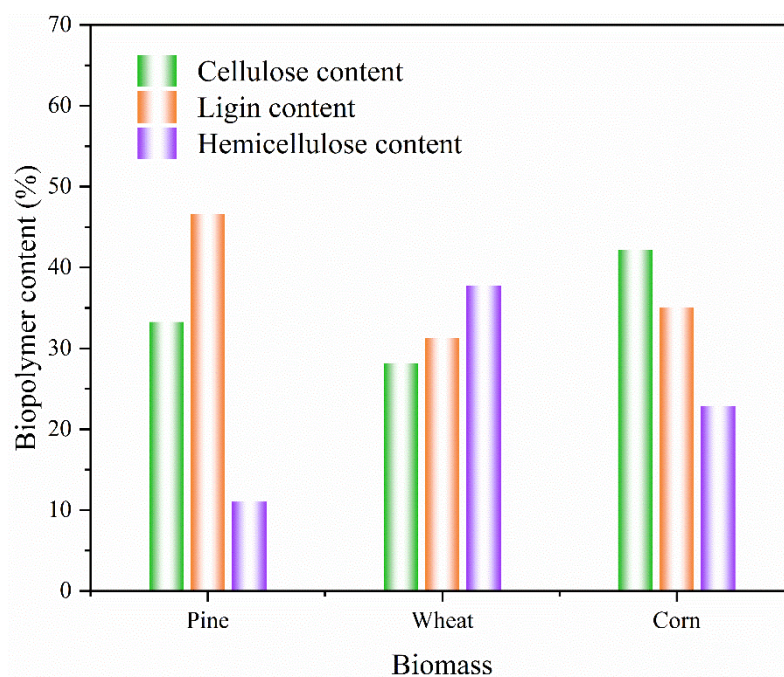

**Fig. S8.** Contents of cellulose, hemicellulose and lignin in the raw pine, wheat straw and corn straw.

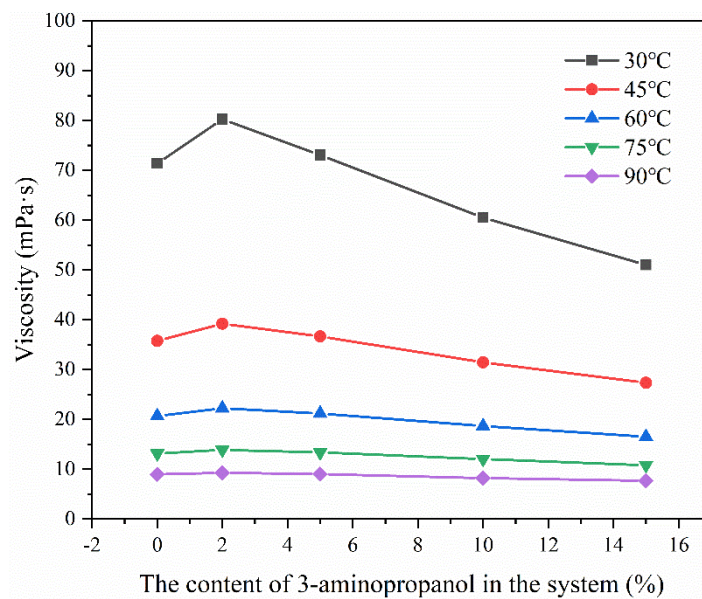

**Fig. S9.** Viscosity of 3-aminopropanol/[EMIM]Ac systems with different additive contents.

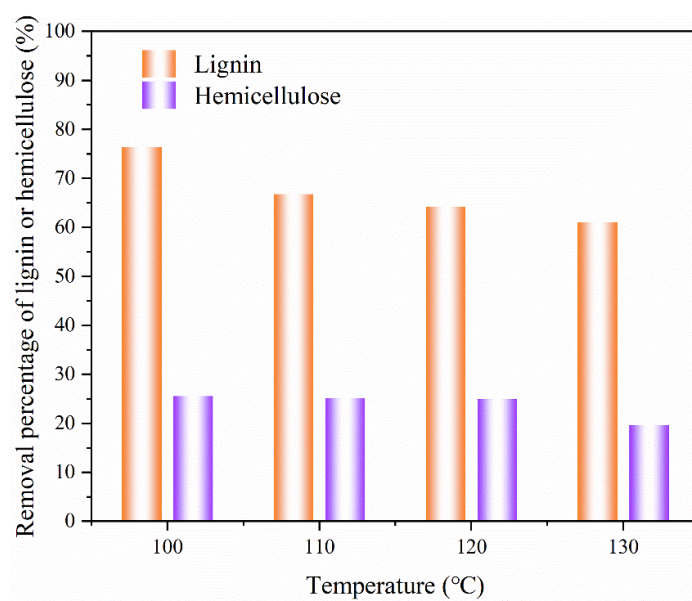

**Fig. S10.** Removal percentages of lignin and hemicellulose from the raw pine at different temperatures.
